1 **Feline Papillomavirus Strain P20 Assembled from Metagenomic Data Isolated**  
2 **from the Human Skin of a House Cat Owner**

3  
4 Ema H. Graham <sup>1</sup>, Michael S. Adamowicz <sup>2</sup>, Peter C Angeletti <sup>3,4</sup>, Jennifer L. Clarke <sup>5,6</sup>,  
5 Samodha C. Fernando <sup>7</sup>, Joshua R. Herr <sup>4,8,9,#</sup>

6  
7 <sup>1</sup> PhD Program in Complex Biosystems, University of Nebraska, 68583, Lincoln, NE,  
8 USA

9 <sup>2</sup> College of Agricultural Sciences & Natural Resources, University of Nebraska, Lincoln,  
10 NE 68583, USA

11 <sup>3</sup> Nebraska Center for Virology, University of Nebraska, Lincoln, NE 68583

12 <sup>4</sup> School of Biological Sciences, University of Nebraska, Lincoln, NE 68588

13 <sup>5</sup> Department of Statistics, University of Nebraska, Lincoln, NE, 68588, USA

14 <sup>6</sup> Food Science and Technology Department, University of Nebraska, Lincoln, NE  
15 68588 USA

16 <sup>7</sup> Department of Animal Science, University of Nebraska, Lincoln, NE, 68583, USA

17 <sup>8</sup> Department of Plant Pathology, University of Nebraska, Lincoln, NE 68503, USA

18 <sup>9</sup> Center for Plant Science Innovation, University of Nebraska, Lincoln, NE 68503, USA

19

20 # Corresponding Author

21 Joshua R. Herr, PhD;

22 422 Plant Sciences Hall

23 University of Nebraska

24 Lincoln NE 68583

25 Email: [jherr@unl.edu](mailto:jherr@unl.edu)

26 Phone: +1 (402) 472-1352

27

28 **RUNNING TITLE:** Feline papillomavirus from human skin metagenome

29

30 **KEYWORDS**

31 Virome, Metagenome, Human Skin, Papilloma Virus, Feline *Papillomaviridae*

32

33

34 **ABSTRACT**

35 A feline papillomavirus was assembled from metagenomic sequencing data collected  
36 from the human skin of a house cat owner. This circular papillomavirus strain P20 is  
37 8069 bp in length, has a GC content of 54.38%, and displays genome organization  
38 typical of feline papillomaviruses with six annotated protein coding regions. The genome  
39 exhibits approximately 75% sequence similarity to other feline papillomavirus genomes.

40

41 **ANNOUNCEMENT**

42 Papillomaviruses are most recognized for infecting humans, but they also broadly infect  
43 mammals, reptiles, and birds (1). Classification of papillomaviruses has largely focused  
44 on the sequence divergence of the Major Capsid Protein L1. High conservation of the  
45 L1 protein across papillomaviruses suggests their evolution mirrors the phylogeny of  
46 their hosts (2). Recent studies have reported on the discovery and diversity of  
47 papillomaviruses associated with domestic and wild cats (3). Seven types of feline  
48 papillomaviruses are currently recognized that may or may not produce both skin and  
49 oral squamous cell carcinomas in house cats (4).

50

51 In a previous study we addressed the diversity and stability of DNA viruses on human  
52 skin by sampling three anatomical locations – left hand, right hand, and scalp – over a  
53 longitudinal 6-month period for 43 human subjects (5). Briefly, samples were collected  
54 using a tandem dry and wet swab technique. Swabs were then saturated in 1x PBS and  
55 were centrifuged at 20,000xg. Sample eluent was then run through a 0.22 µm filter to  
56 remove cellular and bacterial contaminants and the resulting filtrate was used for viral

57 DNA extraction using the QiAmp Ultra-Sensitive Virus Kit (Qiagen, Hilden, Germany)  
58 and whole genome amplification using the TruePrime WGA Kit (Syngen Biotechnology,  
59 Inc, Taipei City, Taiwan), each according to the manufacturer's protocol. The resulting  
60 DNA was sheared to 600 bp prior to library preparation using the NEBNext Ultra II  
61 Library preparation kit (New England Biolabs, Ipswich, MA, USA) according to the  
62 manufacturer's protocol. The libraries were then sequenced as 150 bp paired-end reads  
63 on the Illumina HiSeq 2500 platform (Illumina, Inc, San Diego, CA, USA). During that  
64 study (5), we identified one participant with a metagenome which consistently showed  
65 the presence of a feline papillomavirus and who also self-identified as being an owner of  
66 a domesticated house cat.

67  
68 To further investigate this observation, 15 metagenome samples from that specific  
69 human individual were mapped to a *Papillomaviridae* reference database compiled from  
70 NCBI using BMap v38.94 with a minimum match of 95% bp similarity and a k-value of  
71 13 (6). Mapped reads were then processed using KHMER v2.0.0 (7) to remove  
72 singletons and overly-abundant reads using k-mer profiles. All filtered papillomavirus  
73 reads were then de-novo assembled using MEGAHIT v1.2.8 (8) and the subsequent  
74 assembly quality was assessed using QUAST v5.0.2 (9). Read coverage for the  
75 assembly was an average of 295.18 with a standard deviation of 46.61 reads per base.  
76 To quality check the metagenome assembly, the putative viral contigs were evaluated  
77 using CheckV v0.7.0 (10), and classified using nucleotide-based classification tools,  
78 such as Kraken2 v2.0.8-beta (11), Demovir (<https://github.com/feargalr/Demovir>), and  
79 Blastn (with a >10% query coverage cut-off) (12), as well as the protein-coding

80 classification tool Kaiju v1.7 (13). All tools were run with default parameters unless  
81 otherwise specified.

82

83 A complete circular feline papillomavirus genome assembly was identified which  
84 showed 74% sequence similarity to feline papillomavirus type 2 (family  
85 *Papillomaviridae*, genus *dyothetapapillomavirus*). Genes of this single virus were  
86 annotated with PROKKA v1.14.5 (14) using the embedded viral annotation database  
87 and Cenote-Taker 2 v. 2.1 (15). This genome, which we identified as strain P20, was  
88 8069 bp in length and exhibited a GC content of 54.38%. Six open reading frames were  
89 annotated, including the E6 Protein, E7 protein, E1 protein, E2 protein, Late Protein L2,  
90 and Major capsid protein L1 – which are shared among many animal papillomaviruses  
91 (1) (Figure 1; visualized with SnapGene, GSL Biotech LLC, San Diego, CA;  
92 <https://snapgene.com>). Using BLASTn, our genome assembly showing the greatest  
93 similarity (with an average of 70.3% shared amino acids) to a papillomavirus isolated  
94 from the skin of a domestic Maine Coon house cat in 2007 (GenBank accession  
95 NC038520).

96

97 To determine the phylogenetic placement of strain P20 identified here, we downloaded  
98 all feline papilloma genomes available on NCBI (along with two outgroups from closely  
99 related hosts – domestic dog and Weddell Seal) then aligned the six shared annotated  
100 genes using MUSCLE v3.8.1551 (16). After removal of uninformative amino acid  
101 regions using GBLOCKS v0.91b (17), a phylogenetic tree (Figure 1) was generated  
102 using IQTREE v1.6.12 (18) under the LG+F+I+G4 substitution model optimally

103 determined by MODEL-FINDER v1.5.4 (19). This phylogeny, visualized with FIGTREE  
104 v1.4.4 (<https://github.com/rambaut/figtree>), placed our genome in proximity to other  
105 feline papilloma type 2 accessions.

106

## 107 **DATA AVAILABILITY**

108 All raw sequencing data has been deposited in the NCBI Short Read Archive (SRA)  
109 under the accession code [PRJNA754140](https://www.ncbi.nlm.nih.gov/submitter/PRJNA754140). Within that project, the 15 sequencing files  
110 used in this study were the following: SRS9770471, SRS9770472, SRS9770476,  
111 SRS9770495, SRS9770500, SRS9770501, SRS9770587, SRS9770588, SRS9770589,  
112 SRS9770614, SRS9770616, SRS9770617, SRS9770642, SRS9770643, SRS9770644.  
113 The complete feline papillomavirus P20 genome has been submitted to NCBI Genbank  
114 with the accession number of [OL310516](https://www.ncbi.nlm.nih.gov/submitter/OL310516). All metadata, sequences, annotation files, and  
115 scripts used here are publicly available and archived at:  
116 [https://github.com/HerrLab/Graham\\_2021\\_feline\\_papilloma\\_P20](https://github.com/HerrLab/Graham_2021_feline_papilloma_P20).

117

## 118 **FUNDING SOURCES**

119 This work was supported by the Department of Justice (grant numbers 2017-IJ-CX-  
120 0025, 2019-75-CX-0075, and 2019-R2-CX-0048). This funding agency had no role in  
121 study design, data collection and interpretation, or the decision to submit the work for  
122 publication.

123

## 124 **DECLARATION OF COMPETING INTERESTS**

125 None to declare.

126

127 **ACKNOWLEDGMENTS**

128 This work was completed using the Holland Computing Center of the University of  
129 Nebraska, which receives support from the Nebraska Research Initiative.

130 We thank all the anonymous participants for their contribution to this study. We also  
131 thank members of the Fernando Lab who assisted with advice on laboratory methods.

132

133

134  
135  
136  
137  
138  
139  
140  
141  
142  
143  
144  
145  
146  
147  
148  
149  
150  
151  
152  
153  
154  
155  
156  
157  
158  
159  
160  
161  
162  
163  
164  
165  
166  
167  
168  
169  
170  
171  
172  
173  
174  
175  
176  
177  
178  
179

## REFERENCES

1. Rector, A. and Van Ranst, M., 2013. Animal papillomaviruses. *Virology*, 445(1-2), pp.213-223.
2. Rector, A., Lemey, P., Tachezy, R., Mostmans, S., Ghim, S.J., Van Doorslaer, K., Roelke, M., Bush, M., Montali, R.J., Joslin, J. and Burk, R.D., 2007. Ancient papillomavirus-host co-speciation in Felidae. *Genome biology*, 8(4), pp.1-12.
3. Munday, J.S. and Thomson, N.A., 2021. Papillomaviruses in Domestic Cats. *Viruses*, 13(8), p.1664.
4. Kaynarcalidan, O. and Oğuzoğlu, T.Ç., 2021. The oncogenic pathways of papillomaviruses. *Veterinary and Comparative Oncology*, 19(1), pp.7-16.
5. Graham, E.H., Fernando, S., Clarke, J., Herr, J.R. and Adamowicz, M., 2022. The Application of The Skin Virome for Human Identification. *Forensic Science International - Genetics*. doi: <https://doi.org/10.1016/j.fsigen.2022.102662>
6. Bushnell, B. 2014. BBMap: A Fast, Accurate, Splice-Aware Aligner. <https://sourceforge.net/projects/bbmap/>
7. Crusoe M.R., Alameldin H.F., Awad S., Boucher E., Caldwell A., Cartwright R., Charbonneau A., Constantinides B., Edverson G., Fay S., Fenton J., Fenzl T., Fish J., Garcia-Gutierrez L., Garland P., Gluck J., González I., Guermond S., Guo J., Gupta A., Herr J.R., Howe A., Hyer A., Härpfer A., Irber L., Kidd R., Lin D., Lippi J., Mansour T., McA'Nulty P., McDonald E., Mizzi J., Murray K.D., Nahum J.R., Nanlohy K., Nederbragt A.J., Ortiz-Zuazaga H., Ory J., Pell J., Pepe-Ranney C., Russ Z.N., Schwarz E., Scott C., Seaman J., Sievert S., Simpson J., Skennerton C.T., Spencer J., Srinivasan R., Standage D., Stapleton J.A., Steinman S.R., Stein J., Taylor B., Trimble W., Wiencko H.L., Wright M., Wyss B., Zhang Q., zyme e., Brown C.T., 2015. The khmer software package: enabling efficient nucleotide sequence analysis. *F1000 Research*. 2015 Sep 25; 4:900. doi: 10.12688/f1000research.6924.1.
8. Li, D., Liu, C.M., Luo, R., Sadakane, K. and Lam, T.W., 2015. MEGAHIT: an ultra-fast single-node solution for large and complex metagenomics assembly via succinct de Bruijn graph. *Bioinformatics*, 31(10), pp.1674-1676.
9. Gurevich, A., Saveliev, V., Vyahhi, N. and Tesler, G., 2013. QUAST: quality assessment tool for genome assemblies. *Bioinformatics* 29(8), pp.1072-1075.
10. Nayfach, S., Camargo, A.P., Schulz, F., Eloie-Fadrosh, E., Roux, S. and Kyrpides, N.C., 2021. CheckV assesses the quality and completeness of metagenome-assembled viral genomes. *Nature biotechnology*, 39(5), pp.578-585.

- 180  
181 11. Wood, D.E. and Salzberg, S.L., 2014. Kraken: ultrafast metagenomic sequence  
182 classification using exact alignments. *Genome biology*, 15(3), pp.1-12.  
183  
184 12. Camacho, C., Coulouris, G., Avagyan, V., Ma, N., Papadopoulos, J., Bealer, K. and  
185 Madden, T.L., 2009. BLAST+: architecture and applications. *BMC bioinformatics*,  
186 10(1), pp.1-9.  
187  
188 13. Menzel, P., Ng, K.L., Krogh, A., 2016. Fast and sensitive taxonomic classification  
189 for metagenomics with Kaiju. *Nature communications*, 7(1), pp.1-9.  
190  
191 14. Seemann T. 2014. *Prokka: rapid prokaryotic genome annotation*. *Bioinformatics*  
192 2014 Jul 15;30(14):2068-9.  
193  
194 15. Tisza M.J., Belford A.K., Domínguez-Huerta G., Bolduc B., Buck C.B., 2021.  
195 Cenote-Taker 2 democratizes virus discovery and sequence annotation. *Virus*  
196 *Evolution*, Volume 7, Issue 1, January 2021, veaa100,  
197 <https://doi.org/10.1093/ve/veaa100>  
198  
199 16. Edgar, R.C., 2004. MUSCLE: multiple sequence alignment with high accuracy and  
200 high throughput. *Nucleic acids research*, 32(5), pp.1792-1797.  
201  
202 17. Castresana, J. (2000). Selection of conserved blocks from multiple alignments for  
203 their use in phylogenetic analysis. *Molecular Biology and Evolution* 17, 540-552.  
204  
205 18. Minh B.Q., Schmidt, H.A., Chernomor, O., Schrempf, D., Woodhams, M.D., von  
206 Haeseler, A., Lanfear R. (2020) IQ-TREE 2: New models and efficient methods for  
207 phylogenetic inference in the genomic era. *Mol. Biol. Evol.*, 37:1530-1534.  
208 <https://doi.org/10.1093/molbev/msaa015>  
209  
210 19. Kalyaanamoorthy S., Minh B.Q., Wong T.K.F., von Haeseler A., Jermini L.S. (2017)  
211 ModelFinder: Fast model selection for accurate phylogenetic estimates. *Nat.*  
212 *Methods*, 14:587-589. <https://doi.org/10.1038/nmeth.4285>  
213  
214



215 **Figure 1. A.** Linear genome map, 8069 bp in length, of Feline papillomavirus type 2 like  
216 virus. Top portion of the figure shows %GC content for regions of the circular genome.  
217 Higher GC content are shown in warmer colors (red) and lower GC content are shown  
218 in cooler colors (blue). The location of the six gene regions in the genome are shown  
219 below which consist of open reading frame annotations (purple arrows) of the E6  
220 Protein, E7 protein, E1 protein, E2 protein, Late Protein L2, and Major capsid protein  
221 L1. **B.** Phylogenetic tree of the placement of the feline type 2 papillomavirus identified in  
222 this study along with nine other feline papillomaviruses. The tree was rooted with  
223 Canine papillomavirus type 2 and *Leptonychotes weddellii* (Wedell Seal) papilloma virus  
224 type 5.  
225

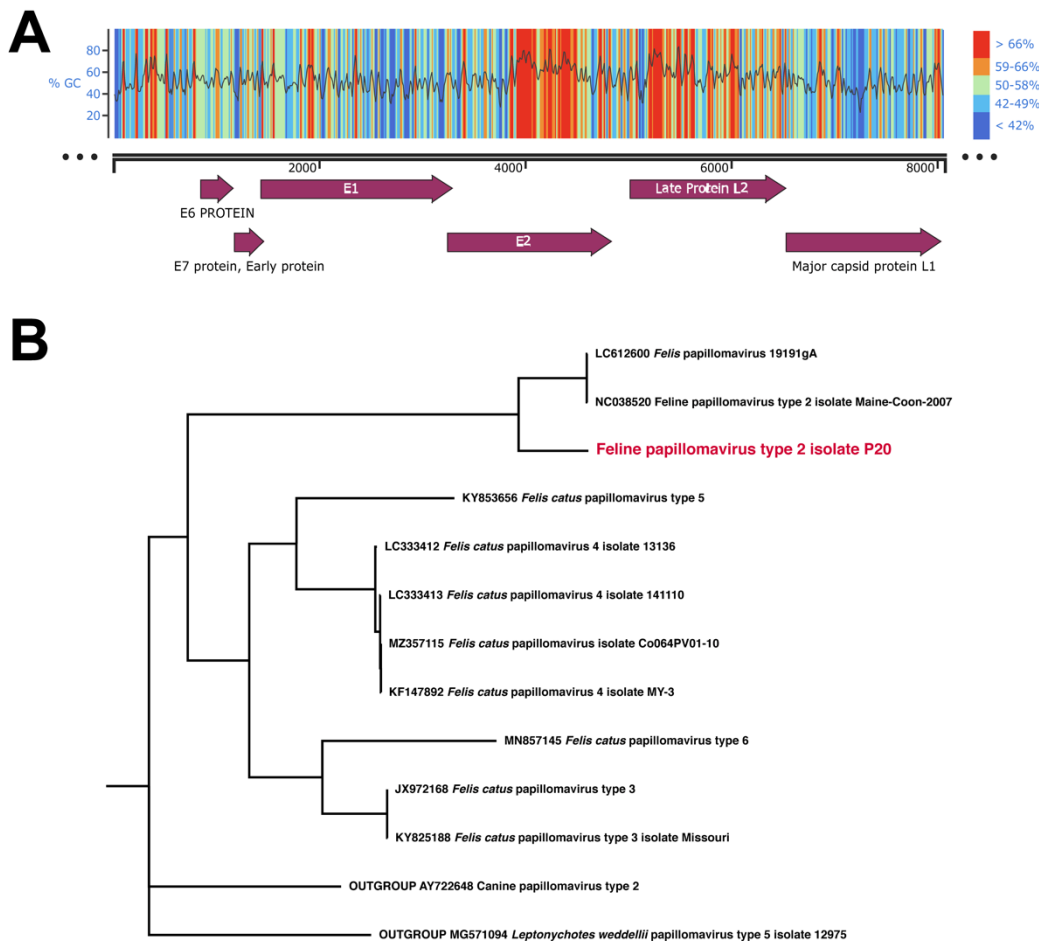

Source: https://www.biorxiv.org/content/10.1101/2021.11.01.466825v3.full.pdf
